# Supplementary material for: A New V361A Mutation in Amaranthus palmeri PPX2 Associated with PPO-Inhibiting Herbicide Resistance
Source: MDPI journal article supplement (doi:10.3390/plants12091886), 2023-05-05
Supplement: s1 [file s1]

## Supplemental Figures

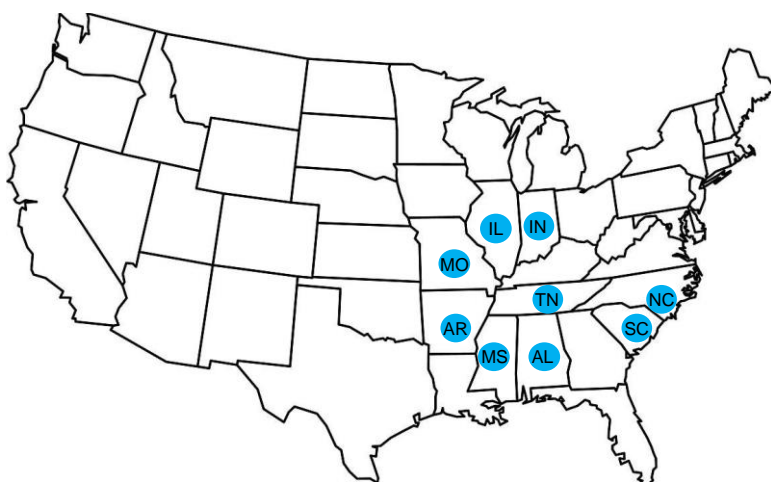

Figure S1. Map of nine states in USA for PPO resistant Palmer survey.

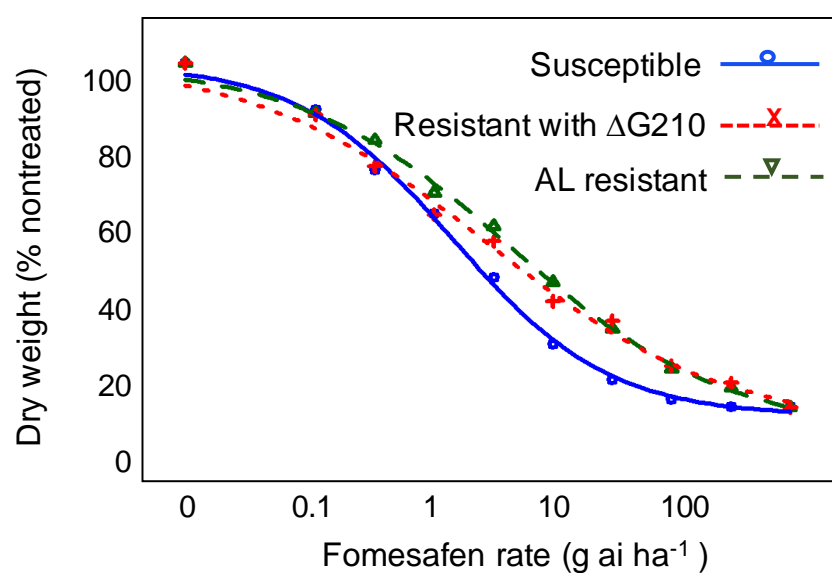

Figure S2. Dose response curve of dry weight in whole plant dose response assay.
